# Supplementary material for: Structural basis for nuclear import selectivity of pioneer transcription factor SOX2
Source: PubMed Central journal article supplement (PMC7782513; doi:10.1038/s41467-020-20194-0), 2021-01-04
Supplement: 41467_2020_20194_MOESM4_ESM.pdf [file 41467_2020_20194_MOESM4_ESM.pdf]

### **Description of Additional Supplementary Files**

File name: Supplementary Movie 1

Description: SOX2 conformational changes upon binding importins and nucleosomes
